# Supplementary material for: The effect of a programme to improve men’s sedentary time and physical activity: The European Fans in Training (EuroFIT) randomised controlled trial
Source: PLOS journal article supplement (doi:10.1371/journal.pmed.1002736), 2019-02-05
Supplement: S4 (10.1371/journal.pmed.1002736.s004) [file journal.pmed.1002736.s004]

Participant IDNO: \_\_\_\_\_

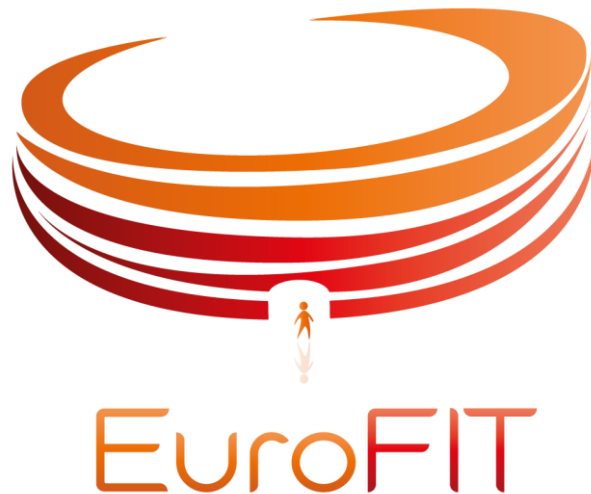

# SELF COMPLETE BASELINE QUESTIONNAIRE

Please allow 30-45 minutes for this questionnaire completion, which includes questions about your physical activity, eating habits, general physical health and wellbeing.

The questions were developed by different people to measure different aspects of health and wellbeing. This means that the scale for responses is often different. Please look very carefully at the questions to check the scale.

There are no right or wrong answers and no trick questions. We simply want you to provide answers that are most relevant to you. Your responses will be confidential to the research team and only used for research purposes.

**Your answers are important to us**

---

**DATE**

|  |  |   |  |  |   |  |  |
|--|--|---|--|--|---|--|--|
|  |  | / |  |  | / |  |  |
|--|--|---|--|--|---|--|--|

# 1. Which of the following football clubs do you support, if any?

(Please tick **ONE** box)

|                                       |                                       |                                       |                                       |                                       |                                       |
|---------------------------------------|---------------------------------------|---------------------------------------|---------------------------------------|---------------------------------------|---------------------------------------|
| Arsenal                               | Everton                               | Newcastle United                      | Manchester City                       | Stoke City                            | Other                                 |
| <input type="checkbox"/> <sub>1</sub> | <input type="checkbox"/> <sub>2</sub> | <input type="checkbox"/> <sub>3</sub> | <input type="checkbox"/> <sub>4</sub> | <input type="checkbox"/> <sub>5</sub> | <input type="checkbox"/> <sub>6</sub> |

☐ , other, please specify:  ... \_\_\_\_\_

## 2. Answer the following questions based on your feelings for the team named above.

(Please tick **ONE** box)

|                                                                                                                                                                                             |                  |                                       |                                       |                                       |                                       |                                       |                                       |                                       |                                       |                   |
|---------------------------------------------------------------------------------------------------------------------------------------------------------------------------------------------|------------------|---------------------------------------|---------------------------------------|---------------------------------------|---------------------------------------|---------------------------------------|---------------------------------------|---------------------------------------|---------------------------------------|-------------------|
| a. How important is it to you that your team wins?                                                                                                                                          | Not important    | <input type="checkbox"/> <sub>1</sub> | <input type="checkbox"/> <sub>2</sub> | <input type="checkbox"/> <sub>3</sub> | <input type="checkbox"/> <sub>4</sub> | <input type="checkbox"/> <sub>5</sub> | <input type="checkbox"/> <sub>6</sub> | <input type="checkbox"/> <sub>7</sub> | <input type="checkbox"/> <sub>8</sub> | Very important    |
| b. How strongly do you see yourself as a fan of your team?                                                                                                                                  | Not at all a fan | <input type="checkbox"/> <sub>1</sub> | <input type="checkbox"/> <sub>2</sub> | <input type="checkbox"/> <sub>3</sub> | <input type="checkbox"/> <sub>4</sub> | <input type="checkbox"/> <sub>5</sub> | <input type="checkbox"/> <sub>6</sub> | <input type="checkbox"/> <sub>7</sub> | <input type="checkbox"/> <sub>8</sub> | Very much a fan   |
| c. How strongly do your friends see you as a fan of your team?                                                                                                                              | Not at all a fan | <input type="checkbox"/> <sub>1</sub> | <input type="checkbox"/> <sub>2</sub> | <input type="checkbox"/> <sub>3</sub> | <input type="checkbox"/> <sub>4</sub> | <input type="checkbox"/> <sub>5</sub> | <input type="checkbox"/> <sub>6</sub> | <input type="checkbox"/> <sub>7</sub> | <input type="checkbox"/> <sub>8</sub> | Very much a fan   |
| d. During the season, how closely do you follow your team via ANY of the following: in person or on television, on the radio, or televised news or a newspaper, or website or social media? | Never            | <input type="checkbox"/> <sub>1</sub> | <input type="checkbox"/> <sub>2</sub> | <input type="checkbox"/> <sub>3</sub> | <input type="checkbox"/> <sub>4</sub> | <input type="checkbox"/> <sub>5</sub> | <input type="checkbox"/> <sub>6</sub> | <input type="checkbox"/> <sub>7</sub> | <input type="checkbox"/> <sub>8</sub> | Almost every day  |
| e. How important is being a fan of your team to you?                                                                                                                                        | Not important    | <input type="checkbox"/> <sub>1</sub> | <input type="checkbox"/> <sub>2</sub> | <input type="checkbox"/> <sub>3</sub> | <input type="checkbox"/> <sub>4</sub> | <input type="checkbox"/> <sub>5</sub> | <input type="checkbox"/> <sub>6</sub> | <input type="checkbox"/> <sub>7</sub> | <input type="checkbox"/> <sub>8</sub> | Very important    |
| f. How much do you dislike the greatest rivals of your team                                                                                                                                 | Do not dislike   | <input type="checkbox"/> <sub>1</sub> | <input type="checkbox"/> <sub>2</sub> | <input type="checkbox"/> <sub>3</sub> | <input type="checkbox"/> <sub>4</sub> | <input type="checkbox"/> <sub>5</sub> | <input type="checkbox"/> <sub>6</sub> | <input type="checkbox"/> <sub>7</sub> | <input type="checkbox"/> <sub>8</sub> | Dislike very much |
| g. How often do you display the above team's name or insignia at your place of work, where you live, or on your clothing?                                                                   | Never            | <input type="checkbox"/> <sub>1</sub> | <input type="checkbox"/> <sub>2</sub> | <input type="checkbox"/> <sub>3</sub> | <input type="checkbox"/> <sub>4</sub> | <input type="checkbox"/> <sub>5</sub> | <input type="checkbox"/> <sub>6</sub> | <input type="checkbox"/> <sub>7</sub> | <input type="checkbox"/> <sub>8</sub> | Always            |

### 3. How far away is the home ground of the team you support from your home?

(Please tick **ONE** box)

|                                       |                                       |                                       |                                       |                                       |
|---------------------------------------|---------------------------------------|---------------------------------------|---------------------------------------|---------------------------------------|
| <i>Less than a mile</i>               | <i>2-3 miles</i>                      | <i>4-5 miles</i>                      | <i>6-10 miles</i>                     | <i>More than 10 miles</i>             |
| <input type="checkbox"/> <sub>1</sub> | <input type="checkbox"/> <sub>2</sub> | <input type="checkbox"/> <sub>3</sub> | <input type="checkbox"/> <sub>4</sub> | <input type="checkbox"/> <sub>5</sub> |

### 4. When you go to your team's home game, how do you usually travel there?

(Please tick **ONE** box)

|                                          |                                                    |                                       |                                          |
|------------------------------------------|----------------------------------------------------|---------------------------------------|------------------------------------------|
| <i>Walk/cycle most or all of the way</i> | <i>Use public transport (bus/tram/metro/train)</i> | <i>Go by car</i>                      | <i>Do not go to my team's home games</i> |
| <input type="checkbox"/> <sub>1</sub>    | <input type="checkbox"/> <sub>2</sub>              | <input type="checkbox"/> <sub>3</sub> | <input type="checkbox"/> <sub>4</sub>    |

☐ <sub>4</sub> other, please specify:  ... \_\_\_\_\_

We are interested in finding out about the kinds of physical activities that people do as part of their everyday lives. The questions will ask you about the time you spent being physically active in the **last 7 days**. Please answer each question even if you do not consider yourself to be an active person. Please think about the activities you do at work, as part of your house and yard work, to get from place to place, and in your spare time for recreation, exercise or sport.

Think about all the **vigorous** activities that you did in the **last 7 days**. **Vigorous** physical activities refer to activities that take hard physical effort and make you breathe much harder than normal. Think *only* about those physical activities that you did for at least 10 minutes at a time.

5. During the last 7 days, on how many days did you do vigorous physical activities like heavy lifting, digging, aerobics, or fast bicycling?

 ... \_\_\_\_\_ days PER WEEK

☐ <sub>1</sub> No vigorous physical activities → *Skip to question 7*

6. How much time did you usually spend doing vigorous physical activities on one of those days?

 ... \_\_\_\_\_ hours PER DAY

 ... \_\_\_\_\_ minutes PER DAY

☐ <sub>1</sub> Don't know/Not sure

Think about all the **moderate** activities that you did in the **last 7 days**.

**Moderate** activities refer to activities that take moderate physical effort and make you breathe somewhat harder than normal. Think only about those physical activities that you did for at least 10 minutes at a time.

7. During the last 7 days, on how many days did you do moderate physical activities like carrying light loads, bicycling at a regular pace, or doubles tennis? Do not include walking.

 ... \_\_\_\_\_ days PER WEEK

☐ <sub>1</sub> No moderate physical activities → *Skip to question 9*

**8. How much time did you usually spend doing moderate physical activities on one of those days?**

 ... \_\_\_\_\_ hours PER DAY

 ... \_\_\_\_\_ minutes PER DAY

☐ <sub>1</sub> Don't know/Not sure

---

Think about the time you spent **walking** in the **last 7 days**. This includes at work and at home, walking to travel from place to place, and any other walking that you might do solely for recreation, sport, exercise, or leisure.

**9. During the last 7 days, on how many days did you walk for at least 10 minutes at a time?**

 ... \_\_\_\_\_ days PER WEEK

☐ <sub>1</sub> No walking → *Skip to question 11*

**10. How much time did you usually spend walking on one of those days?**

 ... \_\_\_\_\_ hours PER DAY

 ... \_\_\_\_\_ minutes PER DAY

☐ <sub>1</sub> Don't know/Not sure

The next question asks you about the time you spend **sitting**.

*(Please write your answers in the spaces provided)*

During the last 7 days, how much time did you spent sitting in the following situations on a **usual week day** and a **usual weekend day**:

|                                                                                                              | WEEK day                                                                                |         | WEEKEND day                                                                             |         |
|--------------------------------------------------------------------------------------------------------------|-----------------------------------------------------------------------------------------|---------|-----------------------------------------------------------------------------------------|---------|
|                                                                                                              | Hours                                                                                   | Minutes | Hours                                                                                   | Minutes |
| <b>11. For TRANSPORT</b><br>(e.g. in car, bus, train, etc.)                                                  |  ...   | Per day |  ...   | Per day |
| <b>12. At WORK</b><br>(e.g. sitting at a desk or using a computer)                                           |  ...   | Per day |  ...   | Per day |
| <b>13. Watching TV</b>                                                                                       |  ...   | Per day |  ...   | Per day |
| <b>14. Using a computer at home</b><br>(e.g. email, games, information, chatting)                            |  ... | Per day |  ... | Per day |
| <b>15. Other leisure activities</b><br>(e.g. socialising, movies etc., but NOT including TV or computer use) |  ... | Per day |  ... | Per day |

*(Please put "0" if you do not spend any time doing it)*

About how many hours in each 24 hour day do you usually spend doing the following:

**16. Sleeping (including at night and naps)**

 ... hours PER DAY

**17. Standing**

 ... hours PER DAY

**18. Please indicate how often you have engaged in the following activities in the LAST MONTH:**

(Please tick **ONE** box on **EACH** line)

|                                                                                                                                                                                                                                 | Never                                                | Occasio<br>nally                      | Some-<br>times                        | Freque<br>ntly                        | Always                                |
|---------------------------------------------------------------------------------------------------------------------------------------------------------------------------------------------------------------------------------|------------------------------------------------------|---------------------------------------|---------------------------------------|---------------------------------------|---------------------------------------|
| <b>a. Used stairs instead of escalators or lifts</b><br>(example: in your apartment block, at a shopping mall, at work, etc.)                                                                                                   | <input type="checkbox"/> <sub>1</sub>                | <input type="checkbox"/> <sub>2</sub> | <input type="checkbox"/> <sub>3</sub> | <input type="checkbox"/> <sub>4</sub> | <input type="checkbox"/> <sub>5</sub> |
| <b>b. Walked instead of driving or taking public transport</b> (example: to go shopping, when you are out and about in your local area, to the post office or pharmacy, etc.)                                                   | <input type="checkbox"/> <sub>1</sub>                | <input type="checkbox"/> <sub>2</sub> | <input type="checkbox"/> <sub>3</sub> | <input type="checkbox"/> <sub>4</sub> | <input type="checkbox"/> <sub>5</sub> |
| <b>c. Parked away from destination or got off public transport early to have a longer walk</b> (example: in a shopping mall, store, cinema, work, etc.)                                                                         | <input type="checkbox"/> <sub>1</sub>                | <input type="checkbox"/> <sub>2</sub> | <input type="checkbox"/> <sub>3</sub> | <input type="checkbox"/> <sub>4</sub> | <input type="checkbox"/> <sub>5</sub> |
| <b>d. Used work breaks to be physically active</b> (example: walk during lunch break, walk to deliver a message to a colleague instead of using email or telephone, choose a bathroom further away from your office room, etc.) | <input type="checkbox"/> <sub>1</sub>                | <input type="checkbox"/> <sub>2</sub> | <input type="checkbox"/> <sub>3</sub> | <input type="checkbox"/> <sub>4</sub> | <input type="checkbox"/> <sub>5</sub> |
|                                                                                                                                                                                                                                 | <input type="checkbox"/> <sub>6</sub> not applicable |                                       |                                       |                                       |                                       |
| <b>e. Chosen to stand up instead of sitting</b><br>(example: at home, while on the telephone, while waiting in a public place, while waiting for transportation, etc.)                                                          | <input type="checkbox"/> <sub>1</sub>                | <input type="checkbox"/> <sub>2</sub> | <input type="checkbox"/> <sub>3</sub> | <input type="checkbox"/> <sub>4</sub> | <input type="checkbox"/> <sub>5</sub> |
| <b>f. Chosen to do things by hand instead of using mechanical/automatic tools</b><br>(example: washing your car or windows)                                                                                                     | <input type="checkbox"/> <sub>1</sub>                | <input type="checkbox"/> <sub>2</sub> | <input type="checkbox"/> <sub>3</sub> | <input type="checkbox"/> <sub>4</sub> | <input type="checkbox"/> <sub>5</sub> |

The next questions look at what you may have **eaten** over the last 7 days. Please read each question carefully, ticking the appropriate box for each option.

**19. About how many times over the LAST 7 DAYS did you eat breakfast?**

(Please tick **ONE** box)

- ☐<sub>1</sub> No times
- ☐<sub>2</sub> 1-2 times
- ☐<sub>3</sub> 3-5 times
- ☐<sub>4</sub> 6 or more times

**20. About how many times over the LAST 7 DAYS did you eat a serving of the following?**

(Please tick **ONE** box on **EACH** line)

|                                                                             | No times                              | 1-2 times                             | 3-5 times                             | 6 or more times                       |
|-----------------------------------------------------------------------------|---------------------------------------|---------------------------------------|---------------------------------------|---------------------------------------|
| <b>a. Cheese</b><br>(any except low fat soft cheese such as cottage cheese) | <input type="checkbox"/> <sub>1</sub> | <input type="checkbox"/> <sub>2</sub> | <input type="checkbox"/> <sub>3</sub> | <input type="checkbox"/> <sub>4</sub> |
| <b>b. Burgers or sausages</b>                                               | <input type="checkbox"/> <sub>1</sub> | <input type="checkbox"/> <sub>2</sub> | <input type="checkbox"/> <sub>3</sub> | <input type="checkbox"/> <sub>4</sub> |
| <b>c. Beef, Pork or Lamb</b><br>(e.g. roast, mince, steak, stews etc.)      | <input type="checkbox"/> <sub>1</sub> | <input type="checkbox"/> <sub>2</sub> | <input type="checkbox"/> <sub>3</sub> | <input type="checkbox"/> <sub>4</sub> |
| <b>d. Fried food</b><br>(e.g. fried fish, fried chicken, fried eggs)        | <input type="checkbox"/> <sub>1</sub> | <input type="checkbox"/> <sub>2</sub> | <input type="checkbox"/> <sub>3</sub> | <input type="checkbox"/> <sub>4</sub> |
| <b>e. Chips or French fries</b>                                             | <input type="checkbox"/> <sub>1</sub> | <input type="checkbox"/> <sub>2</sub> | <input type="checkbox"/> <sub>3</sub> | <input type="checkbox"/> <sub>4</sub> |
| <b>f. Bacon, ham, pate, etc.</b>                                            | <input type="checkbox"/> <sub>1</sub> | <input type="checkbox"/> <sub>2</sub> | <input type="checkbox"/> <sub>3</sub> | <input type="checkbox"/> <sub>4</sub> |
| <b>g. Savoury pies, pasties, sausage rolls, pork pies, etc.</b>             | <input type="checkbox"/> <sub>1</sub> | <input type="checkbox"/> <sub>2</sub> | <input type="checkbox"/> <sub>3</sub> | <input type="checkbox"/> <sub>4</sub> |
| <b>h. Savoury snacks (e.g. crisps, twiglets, tortilla chips, etc)</b>       | <input type="checkbox"/> <sub>1</sub> | <input type="checkbox"/> <sub>2</sub> | <input type="checkbox"/> <sub>3</sub> | <input type="checkbox"/> <sub>4</sub> |



**21. Are you vegetarian?**

☐<sub>1</sub> Yes

☐<sub>2</sub> No

**22. Thinking about the LAST 7 DAYS: about how many times A DAY did you eat or drink the following:**

(Please tick **ONE** box on **EACH** line)

→PLEASE REPORT THE AMOUNT OF TIMES PER DAY

|                                                                            | Less than<br>once a day               | 1-2 times<br>a day                    | 3-5 times<br>a day                    | 6 or more<br>times a day              |
|----------------------------------------------------------------------------|---------------------------------------|---------------------------------------|---------------------------------------|---------------------------------------|
| <b>a. Fruit</b>                                                            | <input type="checkbox"/> <sub>1</sub> | <input type="checkbox"/> <sub>2</sub> | <input type="checkbox"/> <sub>3</sub> | <input type="checkbox"/> <sub>4</sub> |
| <b>b. Vegetables</b> ( <i>not potatoes</i> )                               | <input type="checkbox"/> <sub>1</sub> | <input type="checkbox"/> <sub>2</sub> | <input type="checkbox"/> <sub>3</sub> | <input type="checkbox"/> <sub>4</sub> |
| <b>c. Chocolate, sweets</b>                                                | <input type="checkbox"/> <sub>1</sub> | <input type="checkbox"/> <sub>2</sub> | <input type="checkbox"/> <sub>3</sub> | <input type="checkbox"/> <sub>4</sub> |
| <b>d. Biscuits</b>                                                         | <input type="checkbox"/> <sub>1</sub> | <input type="checkbox"/> <sub>2</sub> | <input type="checkbox"/> <sub>3</sub> | <input type="checkbox"/> <sub>4</sub> |
| <b>e. Sugary drinks</b> ( <i>fizzy drinks,<br/>diluting/ fruit juice</i> ) | <input type="checkbox"/> <sub>1</sub> | <input type="checkbox"/> <sub>2</sub> | <input type="checkbox"/> <sub>3</sub> | <input type="checkbox"/> <sub>4</sub> |

**23. Thinking about the LAST 7 DAYS: about how much milk did you use in A DAY, for drinking or in cereal, tea or coffee?**

(Please tick **ONE** box)

Less than a  
quarter pint

☐<sub>1</sub>

About a  
quarter pint

☐<sub>2</sub>

About  
half a pint

☐<sub>3</sub>

1 pint  
or more

☐<sub>4</sub>

☐<sub>0</sub> I do not drink milk

**24. What kind of milk do you usually use?**

(Please tick **ONE** box)

Full cream  
(blue top)

☐<sub>1</sub>

Semi skimmed  
(green top)

☐<sub>2</sub>

Skimmed  
(red top)

☐<sub>3</sub>

☐<sub>0</sub> I do not drink milk

---

**25. About how many alcoholic drinks do you have each week?**

one drink = a glass of wine, half pint of beer or single measure of spirits

*(Please put "0" if you do not drink, or have less than one drink each week)*

 ... \_\_\_\_\_ number of alcoholic drinks each week

**26. On how many days each week do you usually drink alcohol?**

 ... \_\_\_\_\_ days each week

---

**27. Have you ever smoked?**

*(Please tick **ONE** box)*

☐ <sub>1</sub> No, I've never smoked

☐ <sub>2</sub> Yes, but I am an ex-smoker 

When did you give up?  ... \_\_\_\_\_ (MONTH)  ... \_\_\_\_\_ (YEAR)

☐ <sub>3</sub> Yes, I smoke now 

How many do you usually smoke per day?  ... \_\_\_\_\_ cigarettes/cigars/  
other, please specify:  ... \_\_\_\_\_

The ladder below depicts life satisfaction.

**28. How good is your life when you step back and think about it?**

The 10 at the top represents the best possible life for you, with lower numbers indicating lesser degrees of fulfilment. On which step of the ladder do you feel you stand now?

*(Please tick **ONE** box)*

THE BEST POSSIBLE LIFE

- ☐ 10
- ☐ 9
- ☐ 8
- ☐ 7
- ☐ 6
- ☐ 5
- ☐ 4
- ☐ 3
- ☐ 2
- ☐ 1

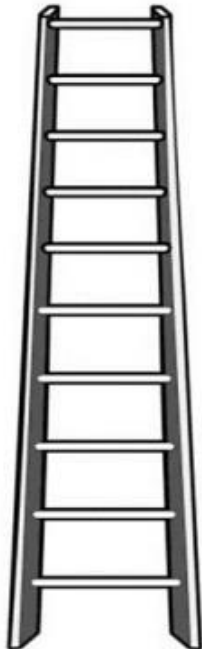

THE LEAST POSSIBLE LIFE

**29. Please tick one box on each line below to show whether you strongly agree, agree, disagree or strongly disagree with each statement....**

*(Please tick **ONE** box on **EACH** line)*

|   |                                                                            | Strongly Agree                        | Agree                                 | Disagree                              | Strongly Disagree                     |
|---|----------------------------------------------------------------------------|---------------------------------------|---------------------------------------|---------------------------------------|---------------------------------------|
| A | On the whole, I am satisfied with myself.                                  | <input type="checkbox"/> <sub>1</sub> | <input type="checkbox"/> <sub>2</sub> | <input type="checkbox"/> <sub>3</sub> | <input type="checkbox"/> <sub>4</sub> |
| B | At times, I think I am no good at all.                                     | <input type="checkbox"/> <sub>1</sub> | <input type="checkbox"/> <sub>2</sub> | <input type="checkbox"/> <sub>3</sub> | <input type="checkbox"/> <sub>4</sub> |
| C | I feel that I have a number of good qualities.                             | <input type="checkbox"/> <sub>1</sub> | <input type="checkbox"/> <sub>2</sub> | <input type="checkbox"/> <sub>3</sub> | <input type="checkbox"/> <sub>4</sub> |
| D | I am able to do things as well as most other people.                       | <input type="checkbox"/> <sub>1</sub> | <input type="checkbox"/> <sub>2</sub> | <input type="checkbox"/> <sub>3</sub> | <input type="checkbox"/> <sub>4</sub> |
| E | I feel I do not have much to be proud of.                                  | <input type="checkbox"/> <sub>1</sub> | <input type="checkbox"/> <sub>2</sub> | <input type="checkbox"/> <sub>3</sub> | <input type="checkbox"/> <sub>4</sub> |
|   |                                                                            | Strongly Agree                        | Agree                                 | Disagree                              | Strongly Disagree                     |
| F | I certainly feel useless at times.                                         | <input type="checkbox"/> <sub>1</sub> | <input type="checkbox"/> <sub>2</sub> | <input type="checkbox"/> <sub>3</sub> | <input type="checkbox"/> <sub>4</sub> |
| G | I feel that I'm a person of worth, at least on an equal plane with others. | <input type="checkbox"/> <sub>1</sub> | <input type="checkbox"/> <sub>2</sub> | <input type="checkbox"/> <sub>3</sub> | <input type="checkbox"/> <sub>4</sub> |
| H | I wish I could have more respect for myself.                               | <input type="checkbox"/> <sub>1</sub> | <input type="checkbox"/> <sub>2</sub> | <input type="checkbox"/> <sub>3</sub> | <input type="checkbox"/> <sub>4</sub> |
| I | All in all, I am inclined to feel that I am a failure.                     | <input type="checkbox"/> <sub>1</sub> | <input type="checkbox"/> <sub>2</sub> | <input type="checkbox"/> <sub>3</sub> | <input type="checkbox"/> <sub>4</sub> |
| J | I take a positive attitude toward myself.                                  | <input type="checkbox"/> <sub>1</sub> | <input type="checkbox"/> <sub>2</sub> | <input type="checkbox"/> <sub>3</sub> | <input type="checkbox"/> <sub>4</sub> |

**30. The following items ask about how you have felt during the PAST MONTH.**

**Please tick one box on each line below to show whether each statement is not at all true or very true for you in general in your life on a 7-point scale.**

*(Please tick **ONE** box on **EACH** line)*

|                                          | Not at<br>all true<br>for me |                            |                            | Somewh<br>at true<br>for me |                            |                            | Very<br>true for<br>me     |
|------------------------------------------|------------------------------|----------------------------|----------------------------|-----------------------------|----------------------------|----------------------------|----------------------------|
| a. I felt alive and vital.               | <input type="checkbox"/> 1   | <input type="checkbox"/> 2 | <input type="checkbox"/> 3 | <input type="checkbox"/> 4  | <input type="checkbox"/> 5 | <input type="checkbox"/> 6 | <input type="checkbox"/> 7 |
| b. I had energy and spirit.              | <input type="checkbox"/> 1   | <input type="checkbox"/> 2 | <input type="checkbox"/> 3 | <input type="checkbox"/> 4  | <input type="checkbox"/> 5 | <input type="checkbox"/> 6 | <input type="checkbox"/> 7 |
| c. I nearly always felt alert and awake. | <input type="checkbox"/> 1   | <input type="checkbox"/> 2 | <input type="checkbox"/> 3 | <input type="checkbox"/> 4  | <input type="checkbox"/> 5 | <input type="checkbox"/> 6 | <input type="checkbox"/> 7 |
| d. I felt energized.                     | <input type="checkbox"/> 1   | <input type="checkbox"/> 2 | <input type="checkbox"/> 3 | <input type="checkbox"/> 4  | <input type="checkbox"/> 5 | <input type="checkbox"/> 6 | <input type="checkbox"/> 7 |

Under each of the 5 headings below, please tick the one box that best describes **your health TODAY**.

**31. Mobility**

|                                           |                            |
|-------------------------------------------|----------------------------|
| I have no problems in walking about       | <input type="checkbox"/> 1 |
| I have slight problems in walking about   | <input type="checkbox"/> 2 |
| I have moderate problems in walking about | <input type="checkbox"/> 3 |
| I have severe problems in walking about   | <input type="checkbox"/> 4 |
| I am unable to walk about                 | <input type="checkbox"/> 5 |

**32. Self-Care**

|                                                     |                            |
|-----------------------------------------------------|----------------------------|
| I have no problems washing or dressing myself       | <input type="checkbox"/> 1 |
| I have slight problems washing or dressing myself   | <input type="checkbox"/> 2 |
| I have moderate problems washing or dressing myself | <input type="checkbox"/> 3 |
| I have severe problems washing or dressing myself   | <input type="checkbox"/> 4 |
| I am unable to wash or dress myself                 | <input type="checkbox"/> 5 |

### 33. Usual Activities (e.g. work, study, housework, family or leisure activities)

I have no problems doing my usual activities

☐

1

I have slight problems doing my usual activities

☐

2

I have moderate problems doing my usual activities

☐

3

I have severe problems doing my usual activities

☐

4

I am unable to do my usual activities

☐

5

### 34. Pain/Discomfort

I have no pain or discomfort

☐

1

I have slight pain or discomfort

☐

2

I have moderate pain or discomfort

☐

3

I have severe pain or discomfort

☐

4

I have extreme pain or discomfort

☐

5

### 35. Anxiety/Depression

I am not anxious or depressed

☐

1

I am slightly anxious or depressed

☐

2

I am moderately anxious or depressed

☐

3

I am severely anxious or depressed

☐

4

I am extremely anxious or depressed

☐

5

**36. We would like to know how good or bad your health is today.**

- This scale on the right is numbered from 0 to 100.
- 100 means the best health you can imagine.  
0 means the worst health you can imagine.
- Mark an X on the scale to indicate how your health is today.
- Now, please write the number you marked on the scale in the box below.

**Your Health Today =**

The best health  
you can imagine

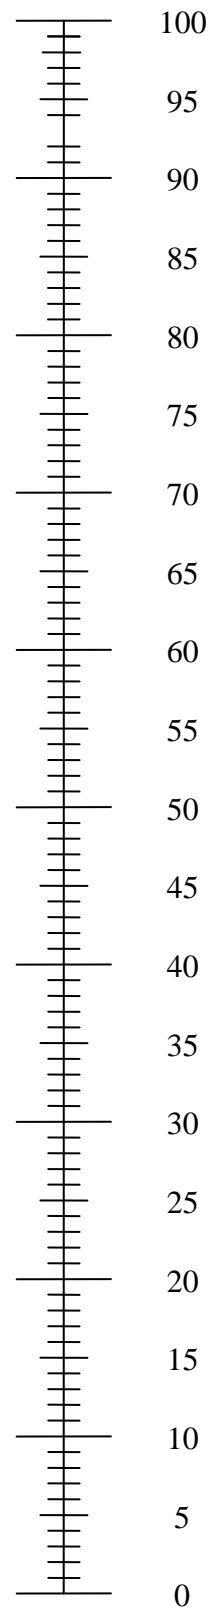

The worst health  
you can imagine

**In the past 3 months, did you use any of the medications listed below on prescription from a doctor?**

Please write down the name of the medication and the number of days you used this medication.  
(Please write your answers in the spaces provided)

**37. Cardiovascular medication (such as diuretics, ACE inhibitors, blood pressure lowering drugs, cholesterol inhibitors)**

☐ I did not use cardiovascular medication

|                                                                                       | Name                                                                                  | Number of days |
|---------------------------------------------------------------------------------------|---------------------------------------------------------------------------------------|----------------|
|  ... |  ... |                |
|  ... |  ... |                |
|  ... |  ... |                |

**38. Painkillers**

☐ I did not use painkillers

|                                                                                         | Name | Number of days |
|-----------------------------------------------------------------------------------------|------|----------------|
|  ... |      |                |
|  ... |      |                |
|  ... |      |                |

**39. Inhalers**

☐ I did not use inhalers

|                                                                                         | Name | Number of days |
|-----------------------------------------------------------------------------------------|------|----------------|
|  ... |      |                |
|  ... |      |                |
|  ... |      |                |



#### 40. Antidepressants

☐ I did not use antidepressants

|                                                                                       | Name | Number of days |
|---------------------------------------------------------------------------------------|------|----------------|
|  ... |      |                |
|  ... |      |                |
|  ... |      |                |

#### 41. Other drugs

☐ I did not use other drugs

|                                                                                         | Name | Number of days |
|-----------------------------------------------------------------------------------------|------|----------------|
|  ...   |      |                |
|  ...   |      |                |
|  ... |      |                |

The next section asks you for a few details about you and your current circumstances.

#### 42. What is your date of birth

 ... / / dd/mm/yyyy

#### 43. What is your country of birth?

 ...

#### 44. What is the country of birth of your mother?

 ...

#### 45. What is the country of birth of your father?

 ...

#### 46. What best describes your current situation?

*(Please put a cross in the most appropriate box)*

- ☐ <sub>1</sub> single
- ☐ <sub>2</sub> married
- ☐ <sub>3</sub> co-habiting /living with a partner
- ☐ <sub>4</sub> separated
- ☐ <sub>5</sub> widowed
- ☐ <sub>6</sub> divorced
- ☐ <sub>7</sub> other, please specify:  ... \_\_\_\_\_

#### 47. How many years of formal education since the age of 5 did you have?

*With formal education we mean education such as school or intermediate certificate (e.g. GCSE), higher school or leaving certificate (e.g. a level or equivalent), trade/apprenticeship (e.g. hairdresser, chef), certificate/diploma (e.g. technician), university degree or higher (e.g. BA/MSc/PhD), etc.*

*(Please put a cross in the box that fits best)*

- ☐ <sub>1</sub> less than 7 years of education
- ☐ <sub>2</sub> 7–9 years of education
- ☐ <sub>3</sub> 10–11 years of education
- ☐ <sub>4</sub> 12–13 years of education
- ☐ <sub>5</sub> 14–15 years of education
- ☐ <sub>6</sub> 16–17 years of education
- ☐ <sub>7</sub> 18 years of education or more
- ☐ <sub>8</sub> other, please specify:  ... \_\_\_\_\_

#### 48. What is your employment status?

(You can put a cross more than one boxes)

- ☐<sub>1</sub> Working full time, please specify your job:  ... \_\_\_\_\_
- ☐<sub>2</sub> Working part-time, please specify your job:  ... \_\_\_\_\_
- ☐<sub>3</sub> Retired
- ☐<sub>4</sub> Caring for the home
- ☐<sub>5</sub> Student
- ☐<sub>6</sub> Not working (but not retired)
- ☐<sub>7</sub> Permanently unable to work/ill
- ☐<sub>8</sub> Other, please specify:  ... \_\_\_\_\_

#### 49. What is the net income of your household PER MONTH, from all sources?

(please include benefits, pensions, superannuation, etc.)

- ☐<sub>1</sub> £ 1,100 or less
- ☐<sub>2</sub> £ 1,100 - 1,700
- ☐<sub>3</sub> £ 1,700 - 2,500
- ☐<sub>4</sub> £ 2,500 - 3,600
- ☐<sub>5</sub> £ 3,600 or more
- ☐<sub>6</sub> Don't know
- ☐<sub>7</sub> I would rather not answer this question

#### 50. People have different reasons why they participate in exercise or do physical activity. If you were to be involved in exercise or do physical activity, please rate the extent to which each statement below is true for you.

(Please tick **ONE** box on **EACH** line)

|                                                 | Not true<br>for me                    |                                       | Sometimes<br>true for me              |                                       | Very true<br>for me                   |
|-------------------------------------------------|---------------------------------------|---------------------------------------|---------------------------------------|---------------------------------------|---------------------------------------|
| a. I exercise because other people say I should | <input type="checkbox"/> <sub>1</sub> | <input type="checkbox"/> <sub>2</sub> | <input type="checkbox"/> <sub>3</sub> | <input type="checkbox"/> <sub>4</sub> | <input type="checkbox"/> <sub>5</sub> |
| b. I feel guilty when I don't exercise          | <input type="checkbox"/> <sub>1</sub> | <input type="checkbox"/> <sub>2</sub> | <input type="checkbox"/> <sub>3</sub> | <input type="checkbox"/> <sub>4</sub> | <input type="checkbox"/> <sub>5</sub> |
| c. I value the benefits of exercise             | <input type="checkbox"/> <sub>1</sub> | <input type="checkbox"/> <sub>2</sub> | <input type="checkbox"/> <sub>3</sub> | <input type="checkbox"/> <sub>4</sub> | <input type="checkbox"/> <sub>5</sub> |

|                                                   | Not true<br>for me                    |                                       | Sometimes<br>true for me              |                                       | Very true<br>for me                   |
|---------------------------------------------------|---------------------------------------|---------------------------------------|---------------------------------------|---------------------------------------|---------------------------------------|
| d. I exercise because it's fun                    | <input type="checkbox"/> <sub>1</sub> | <input type="checkbox"/> <sub>2</sub> | <input type="checkbox"/> <sub>3</sub> | <input type="checkbox"/> <sub>4</sub> | <input type="checkbox"/> <sub>5</sub> |
| e. I feel ashamed when I miss an exercise session | <input type="checkbox"/> <sub>1</sub> | <input type="checkbox"/> <sub>2</sub> | <input type="checkbox"/> <sub>3</sub> | <input type="checkbox"/> <sub>4</sub> | <input type="checkbox"/> <sub>5</sub> |
| f. It's important to me to exercise regularly     | <input type="checkbox"/> <sub>1</sub> | <input type="checkbox"/> <sub>2</sub> | <input type="checkbox"/> <sub>3</sub> | <input type="checkbox"/> <sub>4</sub> | <input type="checkbox"/> <sub>5</sub> |

|                                                                     | Not true<br>for me                    |                                       | Sometimes<br>true for me              |                                       | Very true<br>for me                   |
|---------------------------------------------------------------------|---------------------------------------|---------------------------------------|---------------------------------------|---------------------------------------|---------------------------------------|
| g. I can't see why I should bother exercising                       | <input type="checkbox"/> <sub>1</sub> | <input type="checkbox"/> <sub>2</sub> | <input type="checkbox"/> <sub>3</sub> | <input type="checkbox"/> <sub>4</sub> | <input type="checkbox"/> <sub>5</sub> |
| h. I enjoy my exercise sessions                                     | <input type="checkbox"/> <sub>1</sub> | <input type="checkbox"/> <sub>2</sub> | <input type="checkbox"/> <sub>3</sub> | <input type="checkbox"/> <sub>4</sub> | <input type="checkbox"/> <sub>5</sub> |
| i. I exercise because others will not be pleased with me if I don't | <input type="checkbox"/> <sub>1</sub> | <input type="checkbox"/> <sub>2</sub> | <input type="checkbox"/> <sub>3</sub> | <input type="checkbox"/> <sub>4</sub> | <input type="checkbox"/> <sub>5</sub> |

|                                                              | Not true<br>for me                    |                                       | Sometimes<br>true for me              |                                       | Very true<br>for me                   |
|--------------------------------------------------------------|---------------------------------------|---------------------------------------|---------------------------------------|---------------------------------------|---------------------------------------|
| j. I don't see the point in exercising                       | <input type="checkbox"/> <sub>1</sub> | <input type="checkbox"/> <sub>2</sub> | <input type="checkbox"/> <sub>3</sub> | <input type="checkbox"/> <sub>4</sub> | <input type="checkbox"/> <sub>5</sub> |
| k. I feel like a failure when I haven't exercised in a while | <input type="checkbox"/> <sub>1</sub> | <input type="checkbox"/> <sub>2</sub> | <input type="checkbox"/> <sub>3</sub> | <input type="checkbox"/> <sub>4</sub> | <input type="checkbox"/> <sub>5</sub> |
| l. I feel under pressure from my friends/family to exercise  | <input type="checkbox"/> <sub>1</sub> | <input type="checkbox"/> <sub>2</sub> | <input type="checkbox"/> <sub>3</sub> | <input type="checkbox"/> <sub>4</sub> | <input type="checkbox"/> <sub>5</sub> |

|                                                                   | Not true<br>for me                    |                                       | Sometimes<br>true for me              |                                       | Very true<br>for me                   |
|-------------------------------------------------------------------|---------------------------------------|---------------------------------------|---------------------------------------|---------------------------------------|---------------------------------------|
| m. I get pleasure and satisfaction from participating in exercise | <input type="checkbox"/> <sub>1</sub> | <input type="checkbox"/> <sub>2</sub> | <input type="checkbox"/> <sub>3</sub> | <input type="checkbox"/> <sub>4</sub> | <input type="checkbox"/> <sub>5</sub> |
| n. I think exercising is a waste of time                          | <input type="checkbox"/> <sub>1</sub> | <input type="checkbox"/> <sub>2</sub> | <input type="checkbox"/> <sub>3</sub> | <input type="checkbox"/> <sub>4</sub> | <input type="checkbox"/> <sub>5</sub> |
| o. Being physically active is an important part of who I am       | <input type="checkbox"/> <sub>1</sub> | <input type="checkbox"/> <sub>2</sub> | <input type="checkbox"/> <sub>3</sub> | <input type="checkbox"/> <sub>4</sub> | <input type="checkbox"/> <sub>5</sub> |

## 51. What does 'success' in being physically activity mean to you?

There are no right or wrong answers.

(Please tick **ONE** box on **EACH** line)

### When doing physical activity, I feel most successful when...

|                                      | Strongly agree                        |                                       | Neutral                               |                                       | Strongly disagree                     |
|--------------------------------------|---------------------------------------|---------------------------------------|---------------------------------------|---------------------------------------|---------------------------------------|
| 1. I show other people I am the best | <input type="checkbox"/> <sub>1</sub> | <input type="checkbox"/> <sub>2</sub> | <input type="checkbox"/> <sub>3</sub> | <input type="checkbox"/> <sub>4</sub> | <input type="checkbox"/> <sub>5</sub> |
| 2. I reach personal goals            | <input type="checkbox"/> <sub>1</sub> | <input type="checkbox"/> <sub>2</sub> | <input type="checkbox"/> <sub>3</sub> | <input type="checkbox"/> <sub>4</sub> | <input type="checkbox"/> <sub>5</sub> |
| 3. I try hard                        | <input type="checkbox"/> <sub>1</sub> | <input type="checkbox"/> <sub>2</sub> | <input type="checkbox"/> <sub>3</sub> | <input type="checkbox"/> <sub>4</sub> | <input type="checkbox"/> <sub>5</sub> |
| 4. I beat other people               | <input type="checkbox"/> <sub>1</sub> | <input type="checkbox"/> <sub>2</sub> | <input type="checkbox"/> <sub>3</sub> | <input type="checkbox"/> <sub>4</sub> | <input type="checkbox"/> <sub>5</sub> |
| 5. I show clear personal improvement | <input type="checkbox"/> <sub>1</sub> | <input type="checkbox"/> <sub>2</sub> | <input type="checkbox"/> <sub>3</sub> | <input type="checkbox"/> <sub>4</sub> | <input type="checkbox"/> <sub>5</sub> |
| 6. I am the best                     | <input type="checkbox"/> <sub>1</sub> | <input type="checkbox"/> <sub>2</sub> | <input type="checkbox"/> <sub>3</sub> | <input type="checkbox"/> <sub>4</sub> | <input type="checkbox"/> <sub>5</sub> |

## 52. To what extent do you use the following strategies in order to manage your weight?

(Please tick **ONE** box on **EACH** line)

|                                                                     | Never                                 | Rarely                                | Some times                            | Frequently                            | Always                                |
|---------------------------------------------------------------------|---------------------------------------|---------------------------------------|---------------------------------------|---------------------------------------|---------------------------------------|
| a. Eating breakfast on a daily basis                                | <input type="checkbox"/> <sub>1</sub> | <input type="checkbox"/> <sub>2</sub> | <input type="checkbox"/> <sub>3</sub> | <input type="checkbox"/> <sub>4</sub> | <input type="checkbox"/> <sub>5</sub> |
| b. Limiting quantity (reducing food portions)                       | <input type="checkbox"/> <sub>1</sub> | <input type="checkbox"/> <sub>2</sub> | <input type="checkbox"/> <sub>3</sub> | <input type="checkbox"/> <sub>4</sub> | <input type="checkbox"/> <sub>5</sub> |
| c. Restrict intake of certain types of food (such as. fats, sugars) | <input type="checkbox"/> <sub>1</sub> | <input type="checkbox"/> <sub>2</sub> | <input type="checkbox"/> <sub>3</sub> | <input type="checkbox"/> <sub>4</sub> | <input type="checkbox"/> <sub>5</sub> |
| d. Drinking fewer sugary drinks                                     | <input type="checkbox"/> <sub>1</sub> | <input type="checkbox"/> <sub>2</sub> | <input type="checkbox"/> <sub>3</sub> | <input type="checkbox"/> <sub>4</sub> | <input type="checkbox"/> <sub>5</sub> |
| e. Drinking less alcohol                                            | <input type="checkbox"/> <sub>1</sub> | <input type="checkbox"/> <sub>2</sub> | <input type="checkbox"/> <sub>3</sub> | <input type="checkbox"/> <sub>4</sub> | <input type="checkbox"/> <sub>5</sub> |
| f. Consciously eating more slowly                                   | <input type="checkbox"/> <sub>1</sub> | <input type="checkbox"/> <sub>2</sub> | <input type="checkbox"/> <sub>3</sub> | <input type="checkbox"/> <sub>4</sub> | <input type="checkbox"/> <sub>5</sub> |

**53 How much have you done any of the following over the last 3 months?**

*(Please tick **ONE** box on **EACH** line)*

|   |                                                                                                                  | <i>Not<br/>at all</i>                 | <i>1-2 times<br/>a month</i>          | <i>About<br/>weekly</i>               | <i>Every day<br/>or most<br/>days</i> |
|---|------------------------------------------------------------------------------------------------------------------|---------------------------------------|---------------------------------------|---------------------------------------|---------------------------------------|
| a | tried to limit what you eat or drink to try to lose weight?                                                      | <input type="checkbox"/> <sub>1</sub> | <input type="checkbox"/> <sub>2</sub> | <input type="checkbox"/> <sub>3</sub> | <input type="checkbox"/> <sub>4</sub> |
| b | done an exercise workout (including video/DVD workouts) at home?                                                 | <input type="checkbox"/> <sub>1</sub> | <input type="checkbox"/> <sub>2</sub> | <input type="checkbox"/> <sub>3</sub> | <input type="checkbox"/> <sub>4</sub> |
| c | attended a commercial weight loss programme (e.g. Weight Watchers)                                               | <input type="checkbox"/> <sub>1</sub> | <input type="checkbox"/> <sub>2</sub> | <input type="checkbox"/> <sub>3</sub> | <input type="checkbox"/> <sub>4</sub> |
| d | attended a gym, leisure centre or local sport facility to swim or take part in other physical activity sessions? | <input type="checkbox"/> <sub>1</sub> | <input type="checkbox"/> <sub>2</sub> | <input type="checkbox"/> <sub>3</sub> | <input type="checkbox"/> <sub>4</sub> |
| e | attended a weight-reduction clinic at your GP surgery or another NHS setting?                                    | <input type="checkbox"/> <sub>1</sub> | <input type="checkbox"/> <sub>2</sub> | <input type="checkbox"/> <sub>3</sub> | <input type="checkbox"/> <sub>4</sub> |

**54 Is there anything else you have done over the last 3 months to be more physically active, improve your lifestyle or lose weight?**

*(Please tick **ONE** box)*

Yes ☐<sub>1</sub> If yes, please specify:  ... \_\_\_\_\_

No ☐<sub>2</sub>

**55. How did you hear about the programme?** *(You can put a cross more than one boxes)*

☐<sub>1</sub> club website

☒<sub>2</sub> email from club

☐<sub>3</sub> fans' websites

☐<sub>4</sub> social media (such as Twitter/Facebook)

☐<sub>5</sub> posters at the clubs

☐<sub>6</sub> match day recruitment

☐<sub>7</sub> word of mouth

☐<sub>8</sub> articles or news pieces in the media (newspaper, Radio and TV)

☐<sub>9</sub> work-based advertisement

☐<sub>10</sub> other, please specify:  ... \_\_\_\_\_

**56. What was your reason for joining the programme?**

*(You can put a cross more than one boxes)*

|                                      |                          |                                                            |
|--------------------------------------|--------------------------|------------------------------------------------------------|
| To get fitter                        | <input type="checkbox"/> |                                                            |
| To lose weight                       | <input type="checkbox"/> |                                                            |
| To sit less                          | <input type="checkbox"/> |                                                            |
| To get fitter for a specific reason  | <input type="checkbox"/> | What reason? (e.g. to do more with children)<br>.....      |
| To lose weight for a specific reason | <input type="checkbox"/> | What reason? (e.g. family wedding)<br>.....                |
| To improve lifestyle                 | <input type="checkbox"/> |                                                            |
| Health reasons                       | <input type="checkbox"/> | What health reasons? (personal or family history)<br>..... |
| Someone recommended it to me         | <input type="checkbox"/> | Who? (e.g. former participant)<br>.....                    |
| Someone told me I needed to go on it | <input type="checkbox"/> | Who? (e.g. wife)<br>.....                                  |
| Because it was at the club           | <input type="checkbox"/> |                                                            |
| Because it was with men like me      | <input type="checkbox"/> |                                                            |
| Other                                |                          | Please specify<br>.....                                    |

**57. Do you have any formal role in the club, such as being a steward or being employed in the club?**

*(You can put a cross more than one boxes)*

☐ <sub>1</sub> No

☐ <sub>2</sub> Yes, I am a steward at my club

☐ <sub>3</sub> Yes, I am employed by the club

☐ <sub>4</sub> Yes, I have another role (please tell us what this is)  
.....

*(YOU ARE FINISHED)*
